# Supplementary material for: Ultra-fast synthesis of hierarchical SAPO-11 molecular sieves with the assistance of hydroxyl radicals
Source: Royal Society of Chemistry journal article supplement (doi:10.1039/d3dt03770c), 2024-01-01
Supplement: d3dt03770c1.pdf [file d3dt03770c1.pdf]

**Ultra-fast synthesis of hierarchical SAPO-11 molecular sieves using carbon materials under  
microwave radiation condition**

Dejiang Zheng<sup>a</sup>, Xinchun Liu<sup>a</sup>, Yuling Shan<sup>a</sup>, Shitao Yu<sup>a</sup>, Xiaosheng Wang<sup>b</sup>, Yuxiang Liu<sup>1,\*</sup>

<sup>a</sup> State Key Laboratory Base of Eco-chemical Engineering, College of Chemical Engineering, Qingdao University of Science and  
Technology, Qingdao, China

<sup>b</sup> State Key Laboratory of Heavy Oil Processing, China University of Petroleum-Beijing, Beijing, China

---

\*Corresponding author. E-mail addresses: liuyx@qust.edu.cn.

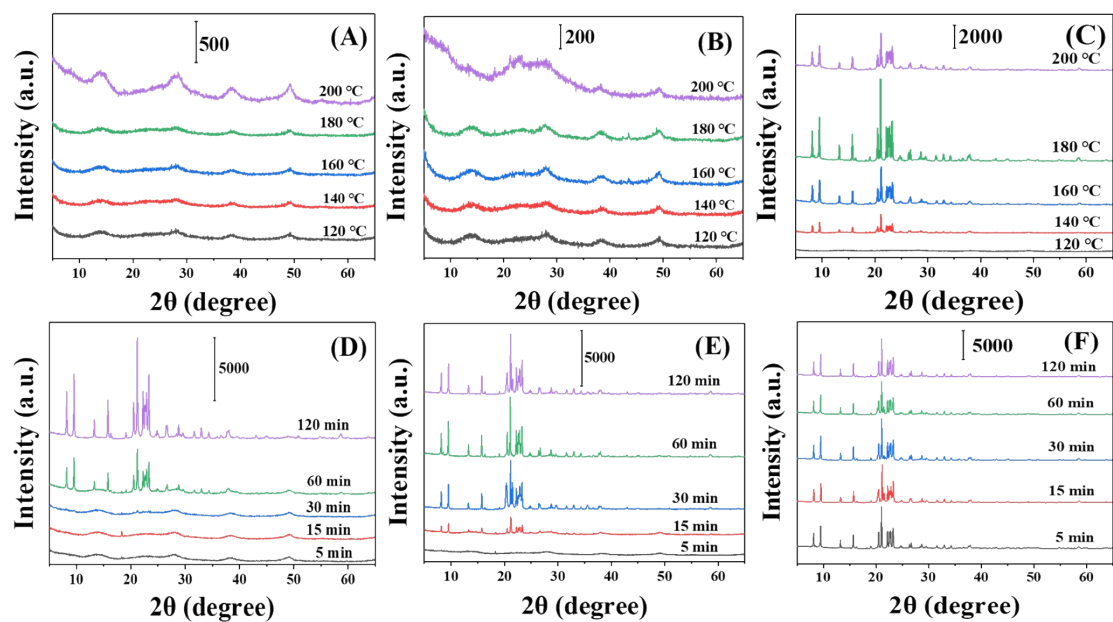

**Fig. S1.** XRD patterns of SAPO-11 synthesized at different crystallization temperatures heated by oven (A), microwave (B), and microwave with carbon (C); XRD patterns of SAPO-11M/W synthesized with microwave radiation power of 0 W (D), 300 W (E), and 600 W (F) for various time. (All samples are uncalcined)

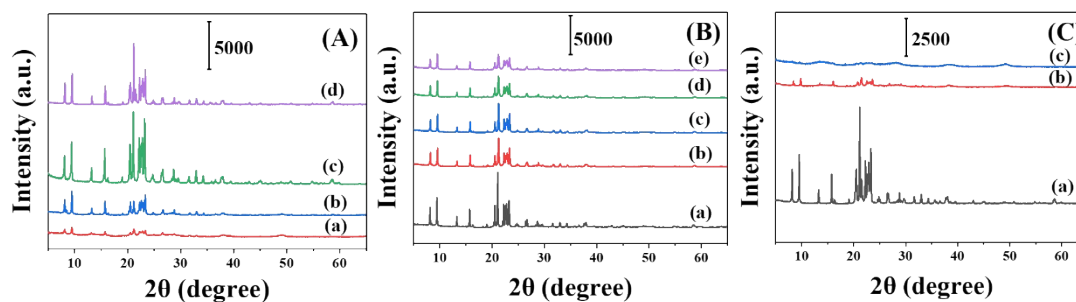

**Fig. S2. XRD patterns of SAPO-11 synthesized with different carbon (A) of (a) Graphene, (b) Graphene oxide, (c) Activated carbon and (d) Biochar. The weight ratio between carbon materials and Pseudoboehmite is 1:110. Effect of hydroxyl radical quencher (i.e., tert-butanol) on the phase structure of SAPO-11 (B). The amount of tert-butanol is controlled by the volume ratio of tert-butanol: silicon sol: (a) 0, (b) 2, (c) 4, (d) 8, and (e) 16 mL. Effect of synthesis atmosphere on the phase structure of SAPO-11 (C): synthesized in air atmosphere (a), synthesized in N<sub>2</sub> atmosphere (b) and synthesized in N<sub>2</sub> atmosphere with hydroxyl radical quencher (weight ratio between hydroxyl radical quencher and silicon sol= 10:1) (c). (All samples are uncalcined)**

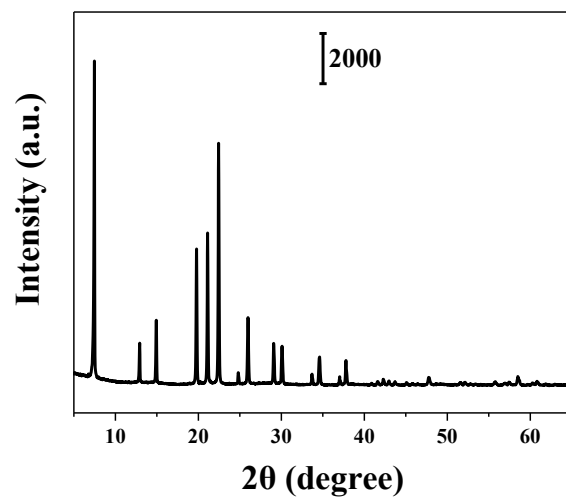

**Fig. S3. XRD patterns of SAPO-5 synthesized by adding biochar under 180 °C for 5 min. (Samples are uncalcined)**

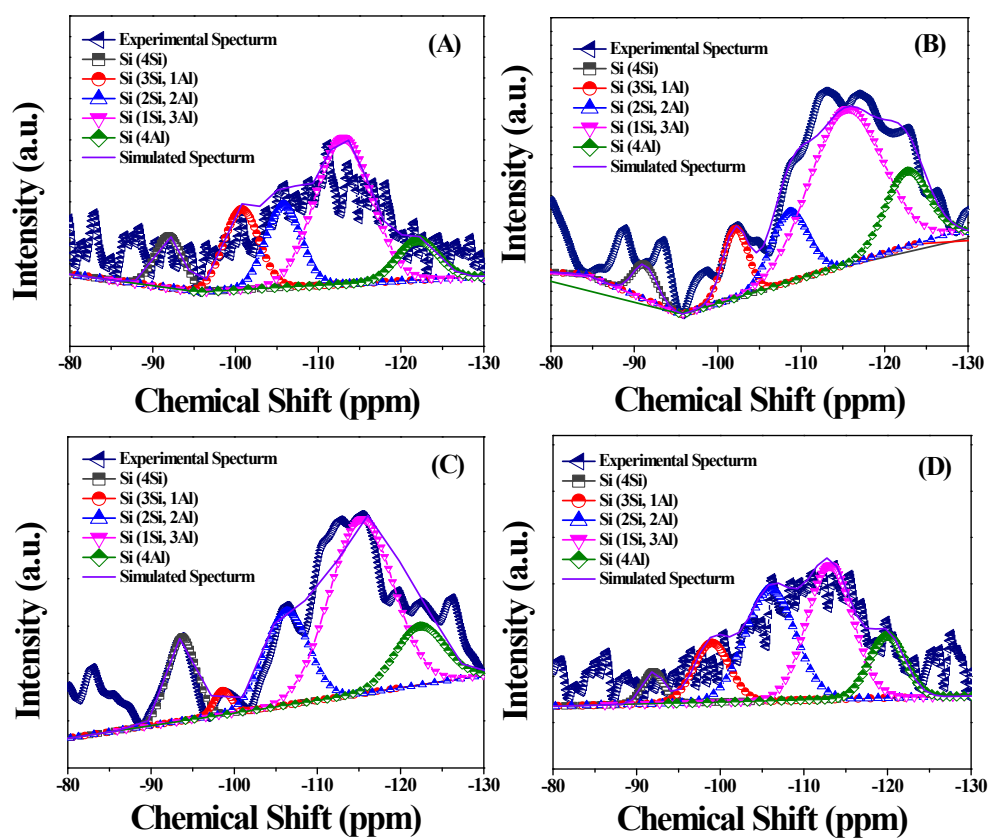

Fig. S4.  $^{29}\text{Si}$  MAS NMR spectra of (a) SAPO-11M(B), (b) SAPO-11M(GO), (c) SAPO-11M(AC) and (d) SAPO-11M(G).

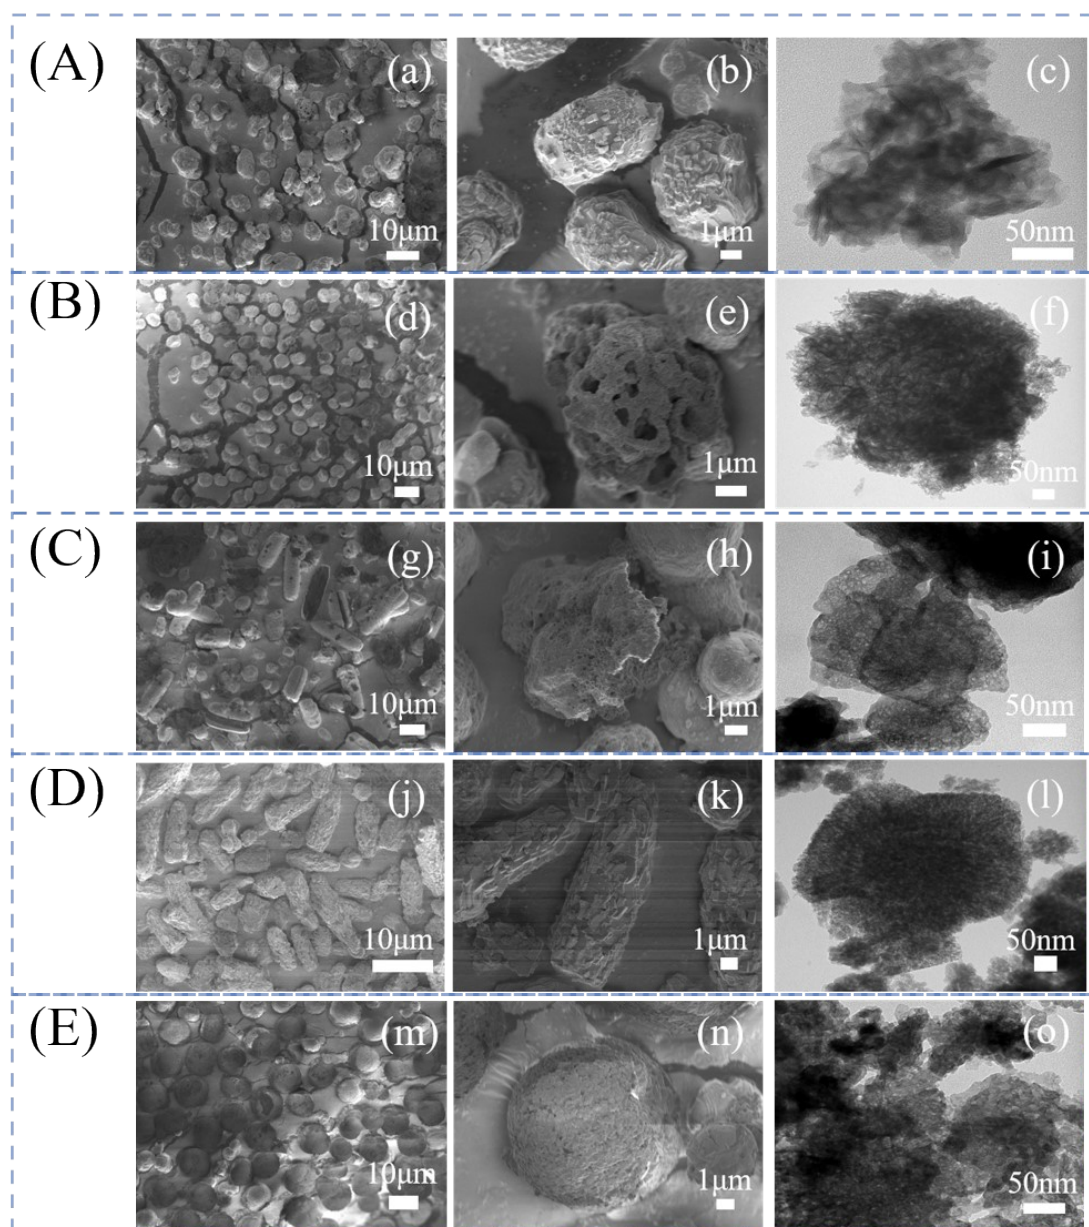

**Fig. S5.** SEM (a, b, d, e, g, h, j, k, m and n) and TEM (c, f, i, l and o) images of SAPO-11 prepared with adding different types of carbon of (A) carbon-free, (B) biochar, (C) graphene oxide, (D) activated carbon and (E) graphene.

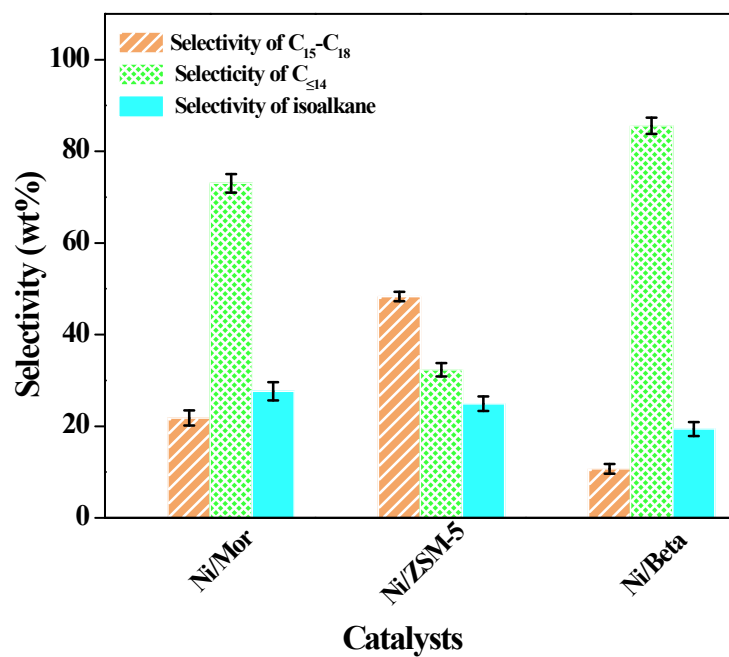

Fig. S6 Product distribution of stearic acid deoxygenation using different catalysts. Conversion of stearic acids is >99%. Impregnation amount of nickel is similar (5 wt%) in catalysts.

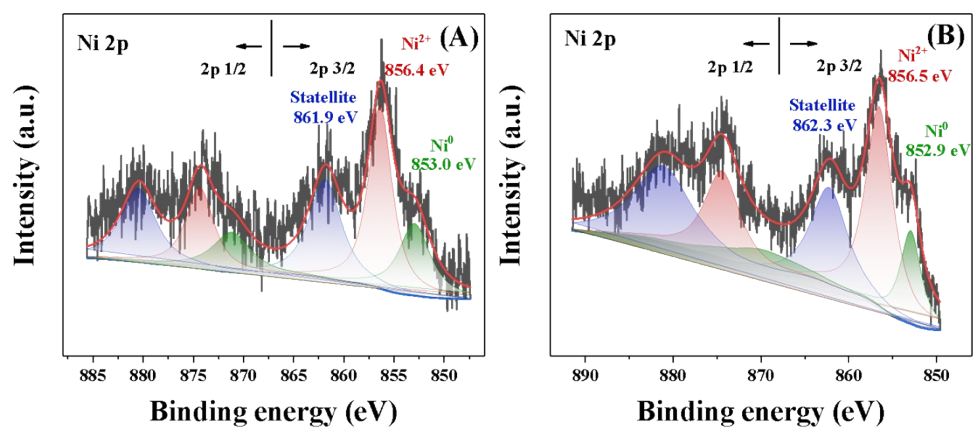

Fig. S7 Ni 2p orbit XPS spectra of (A) Ni/SAPO-11W and (B) Ni/SAPO-11M(B) catalysts.



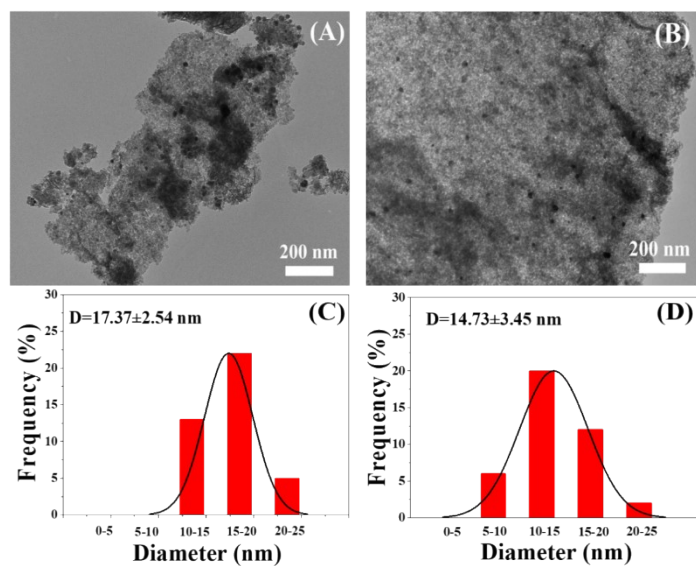

**Fig. S8. TEM images (A and B) and particle size distributions (C and D) of nickel in Ni/SAPO-11W (A and C) and Ni/SAPO-11M(B) (B and D).**

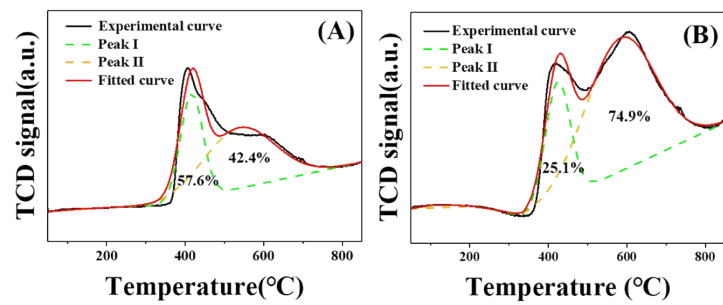

Fig. S9. H<sub>2</sub>-TPR fitted curves of (A) Ni/SAPO-11W and (B) Ni/SAPO-11M(B).

**Table S1. Textural Properties of SAPO-11W, SAPO-11M(B), SAPO-11M(GO), SAPO-11M(AC) and SAPO-11M(G).**

| <b>Samples</b> | <b>S<sub>BET</sub><br/>(m<sup>2</sup>/g)</b> | <b>S<sub>Micro</sub><br/>(m<sup>2</sup>/g)</b> | <b>V<sub>Micro</sub><br/>(cm<sup>3</sup>/g)</b> | <b>V<sub>Meso</sub><br/>(cm<sup>3</sup>/g)</b> | <b>V<sub>Total</sub><br/>(cm<sup>3</sup>/g)</b> |
|----------------|----------------------------------------------|------------------------------------------------|-------------------------------------------------|------------------------------------------------|-------------------------------------------------|
| SAPO-11W       | 171                                          | 112                                            | 0.05                                            | 0.12                                           | 0.17                                            |
| SAPO-11M(B)    | 224                                          | 101                                            | 0.05                                            | 0.23                                           | 0.28                                            |
| SAPO-11M(GO)   | 241                                          | 119                                            | 0.06                                            | 0.24                                           | 0.30                                            |
| SAPO-11M(AC)   | 194                                          | 84                                             | 0.05                                            | 0.22                                           | 0.27                                            |
| SAPO-11M(G)    | 227                                          | 111                                            | 0.06                                            | 0.23                                           | 0.29                                            |

**Table S2. Catalytic performance of catalysts**

| <b>Catalysts</b> | <b>Loading amount of nickel</b> | <b>Conv. (%)</b> | <b>C<sub>15</sub>-C<sub>18</sub> paraffin</b> |
|------------------|---------------------------------|------------------|-----------------------------------------------|
|                  | <b>(wt%)</b>                    |                  | <b>selec. (%)</b>                             |
| 1                | 1 wt%                           | 83.5             | 78.9                                          |
| 2                | 3 wt%                           | 92.4             | 87.0                                          |
| 3                | 5 wt%                           | 99.6             | 98.1                                          |
| 4                | 7wt%                            | 99.8             | 95.2                                          |

Reaction conditions: 290 °C, 3 h, 4 MPa H<sub>2</sub>

**Table S3. Catalytic performance of catalysts**

| <b>Catalysts</b> | <b>Conv. (%)</b> | <b>C<sub>15</sub>-C<sub>18</sub> selec. (%)</b> |
|------------------|------------------|-------------------------------------------------|
| Ni/SAPO-11H*     | 99.3±0.2         | 92.2±0.2                                        |
| Ni/SAPO-11M(B)*  | 99.6±0.2         | 98.1±0.1                                        |
| Ni/SAPO-11M(AC)* | 99.3±0.1         | 97.5±0.3                                        |
| Ni/SAPO-11M(GO)* | 99.6±0.2         | 95.9±0.2                                        |
| Ni/SAPO-11M(G)*  | 99.6±0.1         | 93.9±0.2                                        |
| Ni/SAPO-11H#     | 87.5±1.3         | 29.6±2.2                                        |
| Ni/SAPO-11M(B)#  | 94.4±0.6         | 53.9±1.7                                        |
| Ni/SAPO-11M(AC)# | 93.2±0.5         | 43.0±2.4                                        |
| Ni/SAPO-11M(GO)# | 95.2±0.8         | 40.1±1.9                                        |
| Ni/SAPO-11M(G)#  | 92.9±1.3         | 44.2±2.3                                        |

**Notes:****\*Reaction temperature 290 °C; Reaction duration: 3h; Loading amount of Ni: 5wt%****#Reaction temperature 230 °C; Reaction duration: 3h; Loading amount of Ni: 5wt%**

**Table S4. Concentration of nickel in Ni/SAPO catalysts**

| <b>Sample</b>                  | <b>Ni/SAPO-11W</b> | <b>Ni/SAPO-11M(B)</b> |
|--------------------------------|--------------------|-----------------------|
| Concentration of nickel (wt%)* | 4.3                | 4.1                   |

**\*detected by ICP-MS.**

**Table S5 Concentration of surface metallic particles determined by CO chemisorption**

| Catalyst       | Concentration of surface metallic particles(%) |
|----------------|------------------------------------------------|
| Ni/SAPO-11W    | 35.2                                           |
| Ni/SAPO-11M(B) | 48.3                                           |

**Table S6. Comparison of catalytic performance between published results and current research**

| Catalysts      | Reaction conditions                    | Conv. (%) | C <sub>15</sub> -C <sub>18</sub> paraffin selec. (%) | Iso-paraffins selec. (%) | Ref.                |
|----------------|----------------------------------------|-----------|------------------------------------------------------|--------------------------|---------------------|
| Ni/SAPO-11     | 300 °C,<br>4.0 MPa H <sub>2</sub> , 3h | 96.2      | 93.0                                                 | 9.8                      | 1                   |
| Ni/SAPO-11     | 290 °C,<br>4.0 MPa H <sub>2</sub> , 3h | 97.6      | 92.2                                                 | 10.3                     | 2                   |
| Ni/SAPO-11     | 290 °C,<br>2.0 MPa H <sub>2</sub> , 3h | 92.4      | 98.4                                                 | 7.9                      | 3                   |
| Ni/SAPO-11M(B) | 290 °C,<br>4.0 MPa H <sub>2</sub> , 3h | 99.6      | 98.1                                                 | 8.9                      | Current<br>research |

**References:**

- 1 Y. Wu, J. Duan, X. Li, K. Wu, J. Wang, J. Zheng, S. Li, D. Wang, Z. Zheng, *Renew. Energ.*, 2023, **218**, 119372.
- 2 Y. Liu, D. Zheng, H. Yu, X. Liu, S. Yu, X. Wang, L. Li, J. Pang, X. Liu, Z. Yan, *Micropor. Mesopor. Mat.*, 2020, **303**, 110280.
- 3 D. Zheng, D. Guo, Z. Wang, X. Wang, Y. Shan, X. Liu, Z. Yan, S. Yu, Y. Liu, *Chem. Eng. J.*, 2023, **451**, 138929.



## Detection of hydroxyl radicals (OH<sup>•</sup>)

The method to determine the formation of hydroxyl radicals is based on previous publication. (C. Tai, J. Peng, J. Liu, G. Jiang, H. Zou, *Anal. Chim. Acta.*, 2004, **527**, 73-80.) Hydroxyl radicals react with DMSO to generate formaldehyde, which is reacted with 2,4-dinitrophenylhydrazine (DNPH) to generate corresponding hydrazone (DNPH<sub>0</sub>), which is analyzed by the high performance liquid chromatography-ultraviolet detector focusing an external standard working curve method.

Assuming that DMSO consumes all hydroxyl radicals, the amount of OH<sup>•</sup> produced is calculated based on equations (1-3). The concentration of DNPH<sub>0</sub> indirectly determines the concentration of hydroxyl radicals.

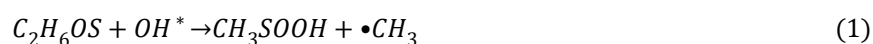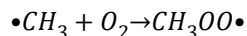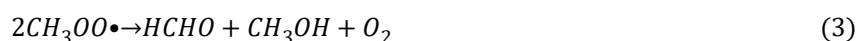

## Test methods

Mobile phase: acetonitrile/water=60/40(V/V), flow rate: 0.6 mL/min, column: Waters XBridge BEH C<sub>18</sub> (4.6\*150 mm, 2.7 μm), oven temperature: 25 °C, UV detector wavelength: 355 nm, injection volume: 20 μL.

The synthesis method is similar to 2.2 (main article), but it is necessary to add 8 mL of 250 mmol/L DMSO standard solutions to the Teflon-lined microwave autoclave before microwave heating, and then heat under microwave conditions. After the reaction is completed and the temperature drops to room temperature, take 2 mL of the suspension and filter it with a 0.45 μm

filter. Then add 2.5 mL of H<sub>3</sub>PO<sub>4</sub> and NaH<sub>2</sub>PO<sub>4</sub> buffer with pH 4.0, 0.2 mL of 6 mmol/L DNPH standard solution and 0.3 mL of ultrapure water. The mixture was kept at room temperature for 30 minutes, and then detected by HPLC.

#### Establishment of standard working curve

Prepare a series of acetonitrile solutions of DNPH<sub>0</sub> with concentrations of 0.00036, 0.00072, 0.00108, 0.00144, and 0.0018 μg/mL. The standard solution was placed in an aqueous solution at 60 °C to react for 20 minutes. Take 20 μL of sample for analysis, and establish a standard working curve of DNPH<sub>0</sub> peak area and concentration, as shown in Fig. S10. The results show that the standard curve has a good linearity in the concentration range of 0.00036-0.0018 μg/mL, R<sup>2</sup>=0.9998.

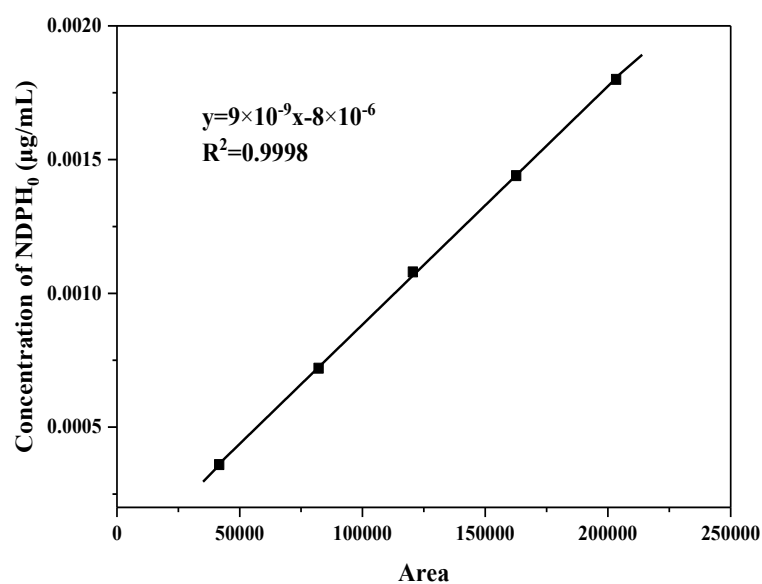

Fig. S10. The relationship between DNPH<sub>0</sub> concentration and peak area
